# Supplementary material for: Intrinsic defects in B-site columnar-ordered halide double perovskites Cs2AgPdBr5
Source: Royal Society of Chemistry journal article supplement (doi:10.1039/d3cp04875f), 2023-01-01
Supplement: d3cp04875f1.pdf [file d3cp04875f1.pdf]

## Supplemental Material

### Intrinsic Defect Physics in B-Site Columnar-Ordered Halide Double Perovskites

#### **Cs<sub>2</sub>AgPdBr<sub>5</sub>**

Wenjun Chu,<sup>a</sup> Xinbo Ma<sup>a</sup> and Zhenyu Li<sup>\*.b</sup>

<sup>a</sup>Hefei National Research Center for Physical Sciences at the Microscale, University of Science and Technology of China, Hefei 230026, Anhui, China

<sup>b</sup>Key Laboratory of Precision and Intelligent Chemistry, University of Science and Technology of China, Hefei 230026, Anhui, China

email: zyli@ustc.edu.cn

Table S1. Comparison of the cubic equilibrium lattice parameters ( $a$ ) and band gaps ( $E_g$ ) between calculated and experimental results<sup>1</sup> for Cs<sub>2</sub>AgPdX<sub>5</sub> (X = Cl, Br) and Cs<sub>2</sub>AgPtCl<sub>5</sub>.

| Systems                             | $a(\text{\AA})$ |      | $E_g(\text{eV})$   |                 |      |
|-------------------------------------|-----------------|------|--------------------|-----------------|------|
|                                     | Cal.            | Exp. | Cal. (without SOC) | Cal. (with SOC) | Exp. |
| Cs <sub>2</sub> AgPdCl <sub>5</sub> | 7.49            | 7.38 | 1.46               | 1.47            | 1.55 |
| Cs <sub>2</sub> AgPdBr <sub>5</sub> | 7.87            | 7.75 | 1.33               | 1.34            | 1.33 |
| Cs <sub>2</sub> AgPtCl <sub>5</sub> | 7.52            | 7.41 | 1.83               | 1.63            | 1.77 |

Table S2.  $\Delta\mu_i$  values for different chemical growth environments as marked in the phase diagram, for Cs<sub>2</sub>AgPdBr<sub>5</sub>.

| Chemical environment | $\Delta\mu_{\text{Ag}}(\text{eV})$ | $\Delta\mu_{\text{Cs}}(\text{eV})$ | $\Delta\mu_{\text{Pd}}(\text{eV})$ | $\Delta\mu_{\text{Br}}(\text{eV})$ |
|----------------------|------------------------------------|------------------------------------|------------------------------------|------------------------------------|
| A                    | -0.3                               | -3.13                              | -0.08                              | -0.836                             |
| B                    | -0.6                               | -3.38                              | -0.60                              | -0.572                             |
| C                    | -0.9                               | -3.57                              | -1.06                              | -0.344                             |

Table S3. Calculated the carrier effective masses and the effective density of states for Cs<sub>2</sub>AgPdX<sub>5</sub> (X = Cl, Br).

|                                     | $m_e^*(m_0)$ | $m_h^*(m_0)$ | $N_c(\text{cm}^{-3})$ | $N_v(\text{cm}^{-3})$ |
|-------------------------------------|--------------|--------------|-----------------------|-----------------------|
| Cs <sub>2</sub> AgPdCl <sub>5</sub> | 0.52         | 0.98         | $9.4 \times 10^{18}$  | $2.9 \times 10^{19}$  |
| Cs <sub>2</sub> AgPdBr <sub>5</sub> | 0.33         | 0.55         | $4.9 \times 10^{18}$  | $1.1 \times 10^{19}$  |

Table S4. Pinned fermi level  $E_F$  (eV), the hole densities  $p_0(\text{cm}^{-3})$ , and electron densities  $n_0(\text{cm}^{-3})$  at the room temperature at three representative chemical potential points A–C in figure 2 for Cs<sub>2</sub>AgPdBr<sub>5</sub>.

| chemical potential points | pinned $E_F$ | $p_0$                | $n_0$                |
|---------------------------|--------------|----------------------|----------------------|
| A                         | 0.66         | $9.4 \times 10^7$    | $2.9 \times 10^7$    |
| B                         | 0.39         | $3.2 \times 10^{12}$ | $8.6 \times 10^2$    |
| C                         | 0.08         | $5.0 \times 10^{17}$ | $5.4 \times 10^{-3}$ |

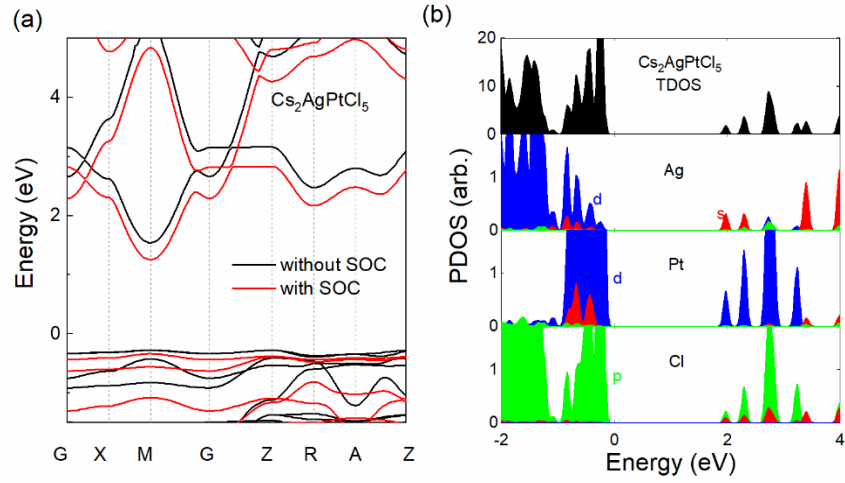

**Fig. S1** (a) Band structure and (b) partial density of state of  $\text{Cs}_2\text{AgPtCl}_5$  at the HSE level of theory.

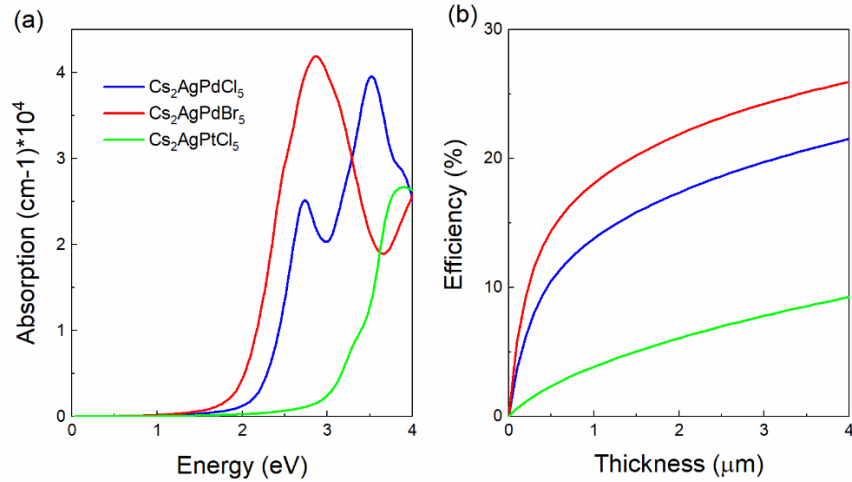

**Fig. S2** (a) Optical absorption coefficient vs incident photon energy and (b) limit of efficiency vs film thickness at 298 K for  $\text{Cs}_2\text{AgPdX}_5$  ( $X = \text{Cl}, \text{Br}$ ) and  $\text{Cs}_2\text{AgPtCl}_5$  calculated at the HSE level of theory.

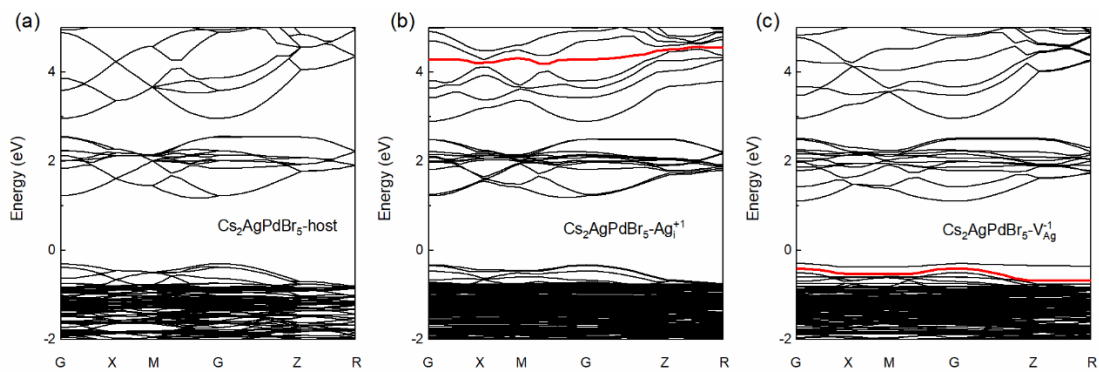

**Fig. S3** Band structures of (a) host, (b)  $\text{Ag}_i^{+1}$  and (c)  $\text{V}_{\text{Ag}}^{-1}$  at the HSE level of theory.

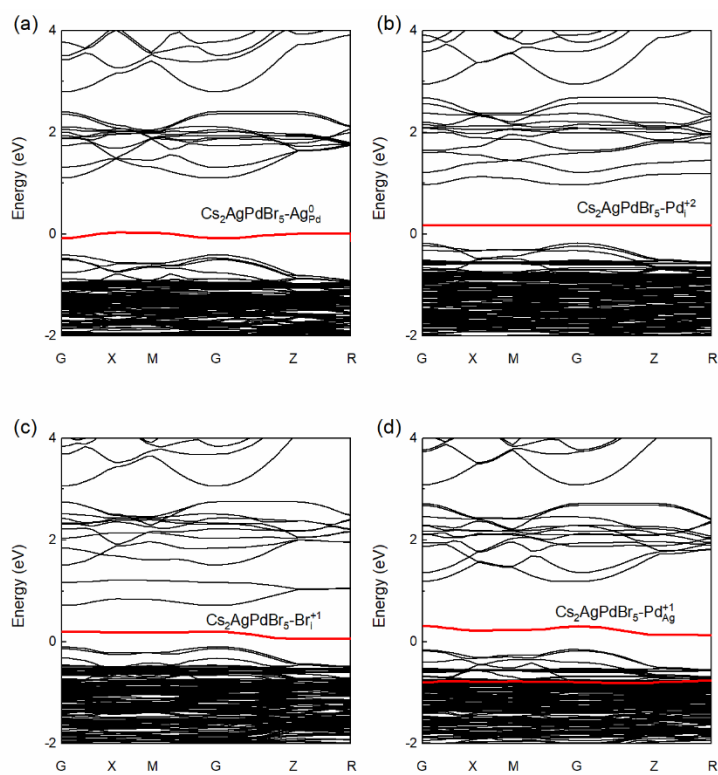

**Fig. S4** Band structures of (a)  $\text{Ag}_{\text{Pd}}^0$ , (b)  $\text{Pd}_i^{+2}$ , (c)  $\text{Br}_i^{+1}$ , and (d)  $\text{Pd}_{\text{Ag}}^{+1}$  at the HSE level of theory, respectively.

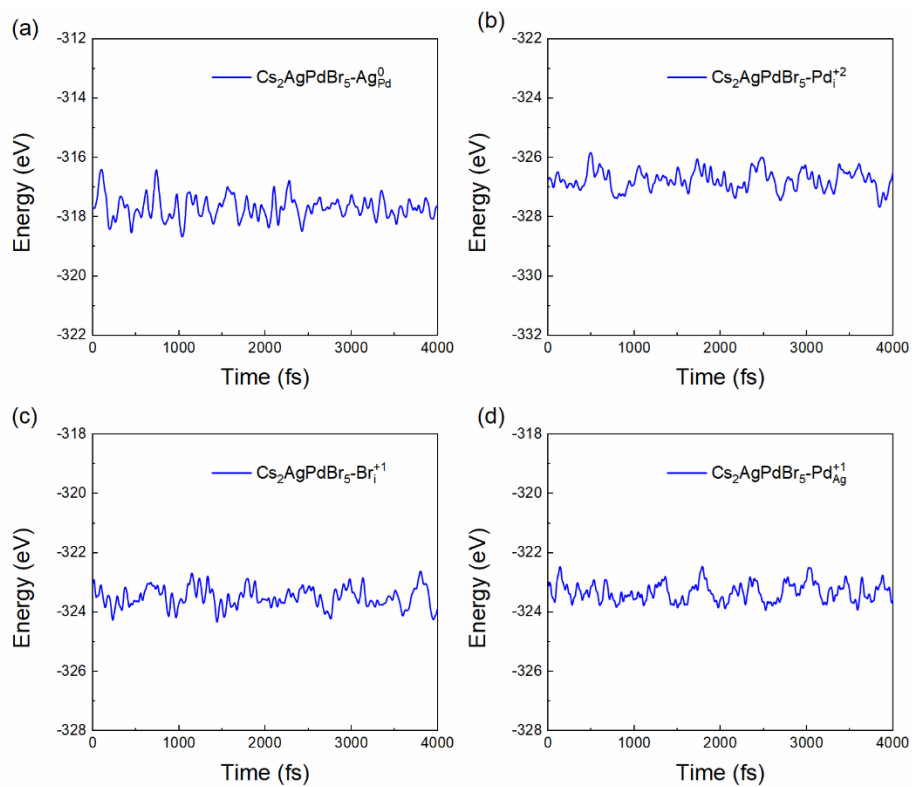

**Fig. S5** The Fluctuation of total potential energy at Gamma point for  $\text{Cs}_2\text{AgPdBr}_5$  during the AIMD simulation at 300 K.

## References

- 1 G. Ji, C. Han, S. Hu, P. Fu, X. Chen, J. Guo, J. Tang and Z. Xiao, *J. Am. Chem. Soc.*, 2021, **143**, 10275-10281.
